# Supplementary material for: Protection against Virulent Infectious Bronchitis Virus Challenge Conferred by a Recombinant Baculovirus Co-Expressing S1 and N Proteins
Source: PubMed Central journal article supplement (PMC6071288; doi:10.3390/v10070347), 2018-06-27
Supplement: viruses-10-00347-s001.pdf [file viruses-10-00347-s001.pdf]

## Supplementary Figure Captions

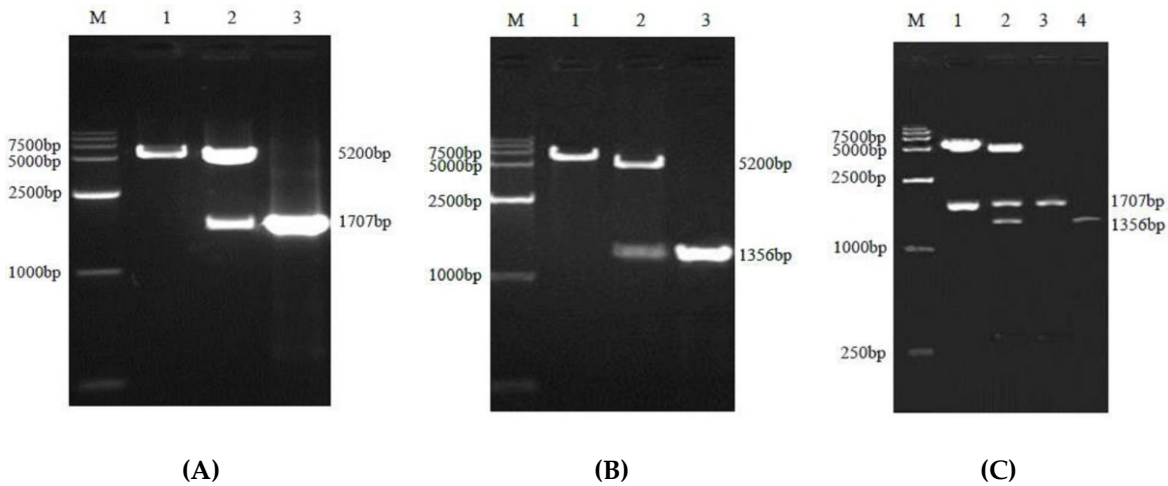

**Figure S1.** Identification of recombinant transposon vectors pFast-HBM-S1, pFast-HBM-N and pFast-HBM-S1-N by PCR and restriction endonuclease digestion. **(A)** Identification of recombinant transposon vectors pFast-HBM-S1. Lane M. DL15000 DNA Marker; Lane 1. pFast-HBM-S1 was digested with *Pst* I, Lane 2. pFast-HBM-S1 digested with *Bam*H I and *Pst* I. Lane 3. PCR identification of pFast-HBM-S1 with HBM-S1 specific primers. **(B)** Identification of recombinant transposon vector pFast-HBM-N. Lane M. DL15000 DNA Marker; Lane 1. pFast-HBM-N was digested with *Kpn* I. Lane 2. pFast-HBM-N was digested with *Xho* I and *Kpn* I. Lane 3. PCR identification of pFast-HBM-N with HBM-N specific primers. **(C)** Identification of recombinant transposon vector pFast-HBM-S1-N. Lane M. DL15000 DNA Marker; Lane 1. pFast-HBM-S1-N was digested with *Bam*H I and *Pst* I, Lane 2. pFast-HBM-S1-N was digested with *Bam*H I, *Pst* I, *Xho* I and *Kpn* I. Lane 3. PCR identification of pFast-HBM-S1-N with HBM-S1 specific primers. Lane 4. PCR identification of pFast-HBM-S1-N with HBM-N specific primers.

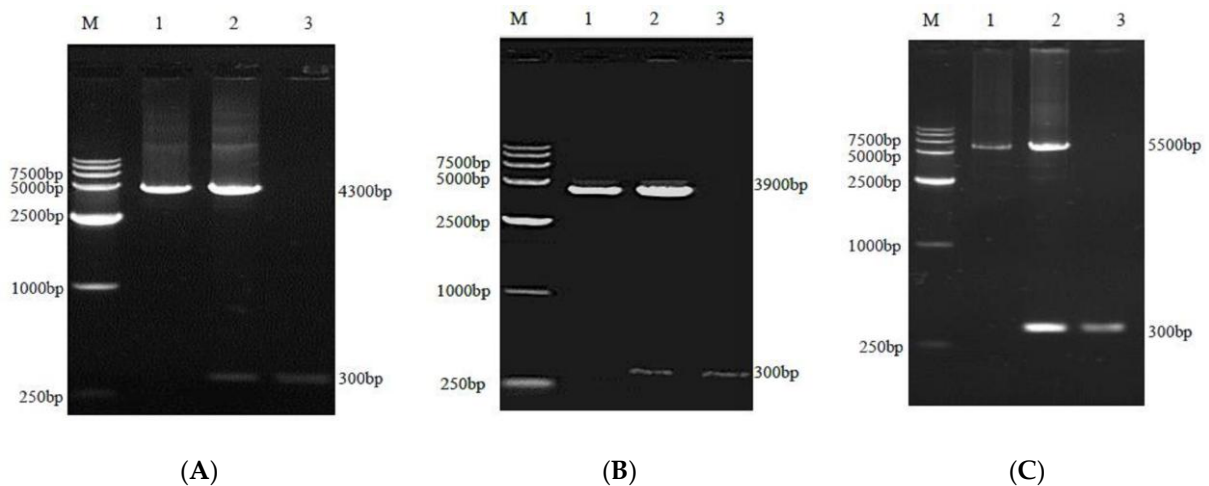

**Figure S2.** Identification of recombinant bacmids rHBM-S1, rHBM-N and rHBM-S1-N by PCR with M13 primers. **(A)** Identification of recombinant bacmids rHBM-S1. Lane M. DL15000 DNA Marker; Lane 1. PCR product of the purified bacmids rHBM-S1; Lane 2. PCR product of the unpurified bacmids rHBM-S1; Lane 3. PCR product of the wild bacmid. **(B)** Identification of recombinant bacmids rHBM-N. Lane M. DL15000 DNA Marker; Lane 1. PCR product of the purified bacmids rHBM-N; Lane 2. PCR product of the unpurified bacmids rHBM-N; Lane 3. PCR product of the wild bacmid. **(C)** Identification of recombinant bacmids rHBM-S1-N. Lane M. DL15000 DNA Marker; Lane 1. PCR product of the purified bacmids rHBM-S1-N; Lane 2. PCR product of the unpurified bacmids rHBM-S1-N; Lane 3. PCR product of the wild bacmid.

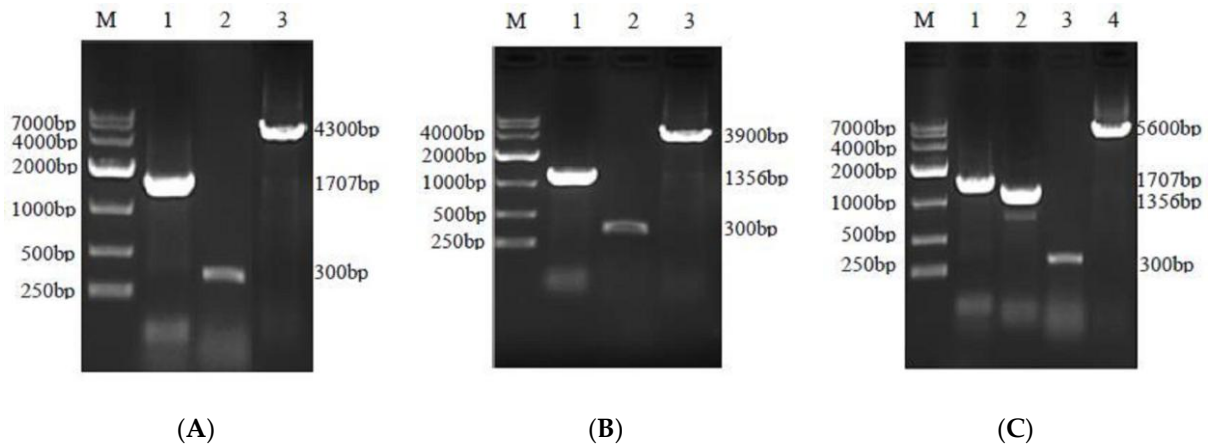

**Figure S3.** Identification of recombinant baculovirus by PCR with IBV specific primers and M13 primers. **(A)** Identification of recombinant baculovirus rHBM-S1. Lane M. DL10000 DNA Maker; Lane 1, PCR product of baculovirus rHBM-S1 with S1 gene specific primers; Lane 2, PCR product of wild baculovirus with M13 primers; Lane 3, PCR product of baculovirus rHBM-S1 with M13 primers. **(B)** Identification of recombinant baculovirus rHBM-N. Lane M. DL10000 DNA Maker; Lane 1, PCR product of baculovirus rHBM-N with N gene specific primers; Lane 2, PCR product of wild baculovirus with M13 primers; Lane 3, PCR product of baculovirus rHBM-N with M13 primers. **(C)** Identification of recombinant baculovirus rHBM-S1-N. Lane M. DL10000 DNA Maker; Lane 1, PCR product of baculovirus rHBM-S1-N with S1 gene specific primers; Lane 2. PCR product of baculovirus rHBM-S1-N with N gene specific primers; Lane 3, PCR product of wild baculovirus with M13 primers; Lane 4, PCR product of baculovirus rHBM-S1-N with M13 primers.

Table S1. All the primers used in this study

| Primer ID | Sequence(5'→3')                                                                                                        | Gene size                    |
|-----------|------------------------------------------------------------------------------------------------------------------------|------------------------------|
| HBM-F1    | CGCGGATCCATGAAATTCCTAGTCAACGTTGCCCTTGTTTTATGGTC ( <i>Bam</i> H I )                                                     | 78 bp                        |
| HBM-R1    | TCGATCCGCATAGATGTAAGAAATGTATACGACCATAAAAAACAAGGGC                                                                      |                              |
| S1-F      | CGCGGATCCATGTTGGGGAAGTCACTGTTTTAGTG ( <i>Bam</i> H I )                                                                 | 1692 bp                      |
| S1-R      | CCCAAGCTTTCAGTGATGGTGATGGTGATGGCCTTGAAAGTACAAGTTTTACGTCTGTGACGACGACTTTCAT ( <i>Hind</i> III)                           |                              |
| HBM-S1-F  | CATTTCTTACATCTATGCGGATCGAAATTTGTTTCATTCTGGT                                                                            | 1707 bp                      |
| HBM-S1-R  | CAAACTGCAGTCAGTGATGGTGATGGTGATGGCCTTGAAAGTACAAGTTTTACGTCTGTGACGACGACTTTC ( <i>Pst</i> I )                              |                              |
| HBM-F2    | CCGCTCGAGATGAAATTCCTAGTCAACGTTGCCCTTGTTTTATGGTC ( <i>Xho</i> I )                                                       | 78 bp                        |
| HBM-R2    | TCGATCCGCATAGATGTAAGAAATGTATACGACCATAAAAAACAAGGGC                                                                      |                              |
| N-F       | CATTTCTTACATCTATGCGGATCGAATGGCAAGCGGTAAGCAGCT                                                                          | 1303 bp                      |
| HBM-N-R   | CGGGGTACCTCAGTGATGGTGATGGTGATGGCCTTGAAAGTACAAGTTTTCAAGTTCATTCTCTCCAAGTGCTGAATCG ( <i>Kpn</i> I )                       |                              |
| HBM-N-F   | CCGCTCGAGATGAAATTCCTAGTCAACGTTGCCCTTGTTTTATGGTCGTATACATTTCTTACATCTATGCGGATCGAATGGCAA<br>GCGGTAAGCAGCT ( <i>Xho</i> I ) | 1356 bp                      |
| HBM-N-R   | CGGGGTACCTCAGTGATGGTGATGGTGATGGCCTTGAAAGTACAAGTTTTCAAGTTCATTCTCTCCAAGTGCTGAATCG ( <i>Kpn</i> I )                       |                              |
| M13-F     | CCCAGTCACGACGTTGTAAAACG                                                                                                | ≈2560 bp +<br>size of insert |
| M13-R     | AGCGGATAACAATTCACACAGG                                                                                                 |                              |
| M-F       | GGTAGAAAACCTTAACAATCC                                                                                                  | 740 bp                       |
| M-R       | AAGACTACTTCCTCCTGTTG                                                                                                   |                              |

Note: The italicized is the restriction enzyme site, the underlined are the 6 × His tag and the TEV protease cleavage site added downstream of the target gene
